# Supplementary material for: Change Detection Applications in the Earth Sciences Using UAS-Based Sensing: A Review and Future Opportunities
Source: MDPI journal article supplement (doi:10.3390/drones7040258), 2023-04-11
Supplement: s1 [file s1]

## SUPPLEMENTARY MATERIALS

Table S1. Studies included in the meta-analysis of spatial and temporal resolutions between UAS, TLS and ALS (Figure 14). We only included studies that explicitly report raster data or product resolution and timing of data acquisitions. We considered the shortest period or smallest resolution in instances of different temporal and spatial resolutions.

| Method | Studies                                                                                                                                              |
|--------|------------------------------------------------------------------------------------------------------------------------------------------------------|
| UAS    | [3,13,14,24,25,33,40–42,45,52,57–59,61,63,65,66,68,75–78,82,99,100,130,135–143], [10,16,23,36,43,67,73,80,84,86–89,91,94,96–98,103,114,115,144–148]. |
| TLS    | [25,34,35,38,63,142,149–157]                                                                                                                         |
| ALS    | [4,62,69,132,158–174]                                                                                                                                |
